# Supplementary material
Source: PubMed Central journal article supplement (PMC7554225)
Supplement: NIHMS1618575-supplement-esi.pdf [file NIHMS1618575-supplement-esi.pdf]

## Supporting Information

Structural elucidation of triacylglycerol using online acetone Paternò–Büchi reaction paired with reversed-phase liquid chromatography mass spectrometry

Elissia T. Franklin<sup>a,b</sup> and Yu Xia<sup>a</sup>

*a. MOE Key Laboratory of Bioorganic Phosphorus Chemistry & Chemical Biology,  
Department of Chemistry, Tsinghua University, Beijing 100084, China*

*b. Department of Chemistry, Purdue University, 560 Oval Drive, West Lafayette, IN, United States, 47907-2084, West Lafayette, IN, United States 47907-2084*

Emails: frank138@purdue.edu; xiayu@mail.tsinghua.edu.cn

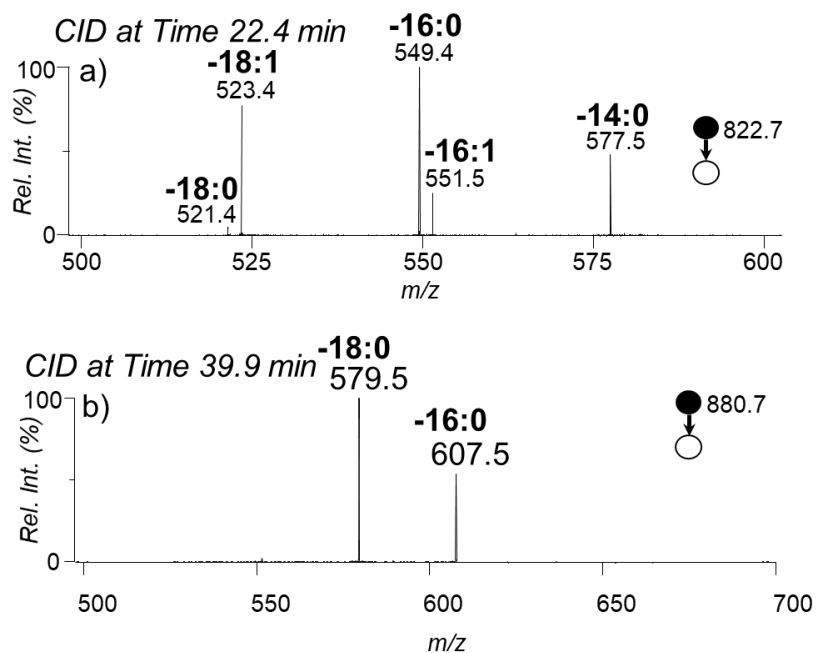

**Supplementary Figure S1.** a) The CID spectrum of the ions at  $m/z$  880.7 eluted at 22.4 minutes from panel a). b) The CID spectrum of the ions at  $m/z$  880.7 eluted at 39.9 minutes.

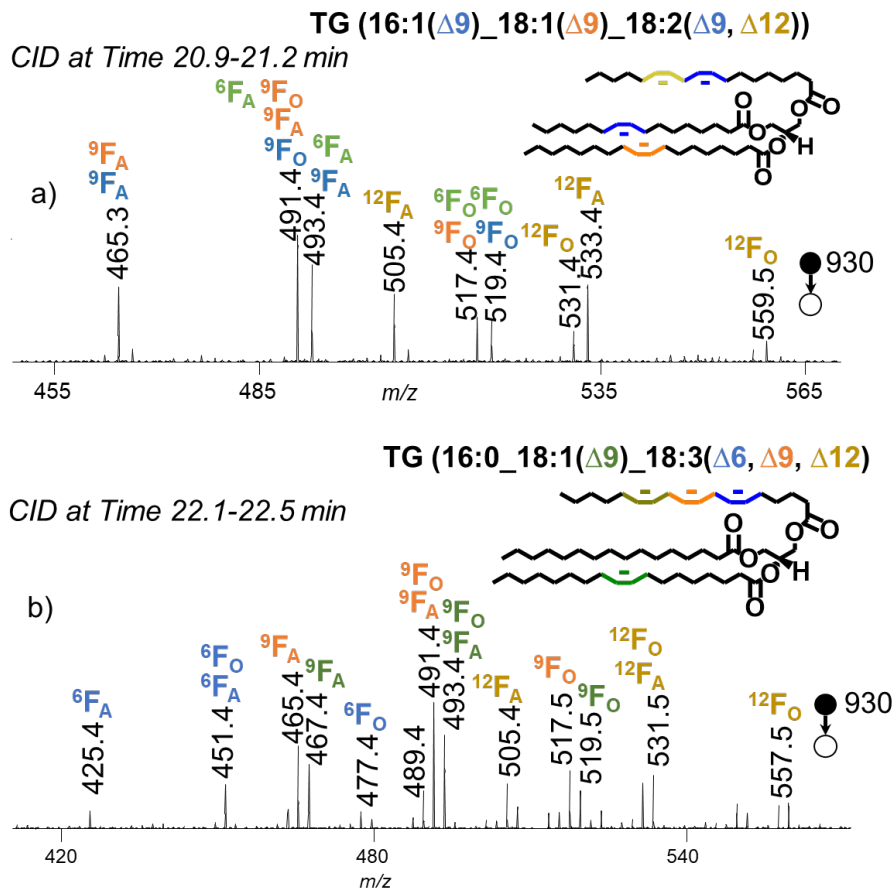

**Supplementary Figure S2.** a) The CID spectrum of the ions at  $m/z$  930.8 eluted from time 20.9-21.2 minutes, b) The CID spectrum of the ions at  $m/z$  930.8 eluted from time 22.1-22.5 minutes.

**Supplementary Table S1.** TG molecular species identified at fatty acyl compositional level in pooled human plasma using RPLC-MS/MS.

| <i>m/z</i> | Subclass | Species             |
|------------|----------|---------------------|
| 708.6      | 40:2     | TG (18:2_16:0_6:0)  |
| 710.6      | 40:1     | TG (18:1_16:0_6:0)  |
| 712.6      | 40:0     | TG (12:0_12:0_16:0) |
| 724.6      | 41:1     | TG (12:0_18:1_11:0) |
| 734.6      | 42:3     | TG (12:0_18:3_12:0) |
| 734.6      | 42:3     | TG (8:1_16:0_18:2)  |
| 736.7      | 42:2     | TG (8:1_16:0_18:1)  |
| 736.7      | 42:2     | TG (18:2_12:0_12:0) |
| 738.7      | 42:1     | TG (12:0_18:1_12:0) |
| 740.7      | 42:0     | TG (16:0_14:0_12:0) |
| 750.7      | 43:3     | TG (9:0_16:0_18:2)  |
| 760.6      | 44:4     | TG (18:2_18:2_8:0)  |
| 762.6      | 44:3     | TG (10:1_18:2_16:0) |
| 764.7      | 44:2     | TG (18:2_16:0_10:0) |
| 766.7      | 44:1     | TG (18:1_16:0_10:0) |
| 768.7      | 44:0     | TG (14:0_14:0_16:0) |
| 780.7      | 44:1     | TG (16:1_14:0_15:0) |
| 782.7      | 45:0     | TG (16:0_15:0_14:0) |
| 786.7      | 46:5     | TG (18:2_10:0_18:3) |
| 788.7      | 46:4     | TG (18:2_10:0_18:2) |
| 794.7      | 46:1     | TG (16:0_14:0_16:1) |
| 796.7      | 46:0     | TG (16:0_14:0_16:0) |
| 806.7      | 47:2     | TG (18:2_15:0_14:0) |
| 808.7      | 47:1     | TG (16:0_15:0_16:1) |
| 810.7      | 47:0     | TG (16:0_15:0_16:0) |
| 814.7      | 48:5     | TG (12:0_18:2_18:3) |
| 816.7      | 48:4     | TG (12:0_18:2_18:2) |
| 818.7      | 48:3     | TG (12:0_18:1_18:2) |
| 820.7      | 48:2     | TG (16:0_16:1_16:1) |
| 822.7      | 48:1     | TG (14:0_16:0_18:1) |
| 822.7      | 48:1     | TG (14:0_16:1_18:0) |
| 824.8      | 48:0     | TG (16:0/16:0/16:0) |
| 824.8      | 48:0     | TG (14:0_16:0_18:0) |
| 834.7      | 49:2     | TG (16:0_18:2_15:0) |

Page Break

Supplementary Table S1. (continued)

| <i>m/z</i> | Subclass | Species             |
|------------|----------|---------------------|
| 836.8      | 49:1     | TG (16:0_18:1_15:0) |
| 838.8      | 49:0     | TG (16:0_16:0_17:0) |
| 842.7      | 50:5     | TG (18:2_18:3_14:0) |
| 844.7      | 50:4     | TG (14:0_18:2_18:2) |
| 846.7      | 50:3     | TG (14:0_18:1_18:2) |
| 846.7      | 50:3     | TG (16:0_16:1_18:2) |
| 846.7      | 50:3     | TG (16:0_16:0_18:3) |
| 848.8      | 50:2     | TG (14:0_18:1_18:1) |
| 848.8      | 50:2     | TG (16:0_16:1_18:1) |
| 848.8      | 50:2     | TG (16:0_16:0_18:2) |
| 850.8      | 50:1     | TG 16:0_16:0_18:1   |
| 852.8      | 50:0     | TG (16:0_18:0_16:0) |
| 856.7      | 51:5     | TG (18:2_18:3_15:0) |
| 856.7      | 51:5     | TG (15:1_18:2_18:2) |
| 858.8      | 51:4     | TG (18:2_18:2_15:0) |
| 860.8      | 51:3     | TG (18:2_18:1_15:0) |
| 862.8      | 51:2     | TG (18:1_18:1_15:0) |
| 864.8      | 51:1     | TG (18:1_16:0_17:0) |
| 866.8      | 51:0     | TG (16:0_18:0_17:0) |
| 866.8      | 51:0     | TG (19:0_16:0_16:0) |
| 870.7      | 52:5     | TG (16:1_18:2_18:2) |
| 870.7      | 52:5     | TG (16:0_18:2_18:3) |
| 872.8      | 52:4     | TG (16:0_18:2_18:2) |
| 872.8      | 52:4     | TG (16:0_18:1_18:3) |
| 872.8      | 52:4     | TG (16:0_16:0_20:4) |
| 872.8      | 52:4     | TG (16:1_18:1_18:2) |
| 874.8      | 52:3     | TG (16:1_18:1_18:1) |
| 874.8      | 52:3     | TG (16:0_18:1_18:2) |
| 876.8      | 52:2     | TG (16:0_18:1_18:1) |
| 876.8      | 52:2     | TG (16:0_18:0_18:2) |
| 878.8      | 52:1     | TG (16:0_18:0_18:1) |
| 880.8      | 52:0     | TG (18:0_18:0_16:0) |
| 884.8      | 53:5     | TG (18:2_17:1_18:2) |
| 888.8      | 53:3     | TG (18:1_18:2_17:0) |
| 888.8      | 53:3     | TG (18:1_17:1_18:1) |
| 890.8      | 53:2     | TG (18:1_17:0_18:1) |
| 892.8      | 53:1     | TG (16:0_19:0_18:1) |
| 892.8      | 54:8     | TG (18:3_18:3_18:2) |

Page Break

**Supplementary Table S1.** (continued)

| <i>m/z</i> | Subclass | Species             |
|------------|----------|---------------------|
| 894.8      | 54:7     | TG (18:3_18:2_18:2) |
| 896.8      | 54:6     | TG (18:2_18:2_18:2) |
| 896.8      | 54:6     | TG (16:0_18:2_20:4) |
| 898.8      | 54:5     | TG (18:1_18:2_18:2) |
| 898.8      | 54:5     | TG (16:0_18:1_20:4) |
| 900.8      | 54:4     | TG (18:1_18:1_18:2) |
| 900.8      | 54:4     | TG (16:0_18:0_20:3) |
| 902.8      | 54:3     | TG (18:1_18:1_18:1) |
| 902.8      | 54:3     | TG (18:0_18:1_18:2) |
| 902.8      | 54:3     | TG (18:0_18:1_18:2) |
| 904.8      | 54:2     | TG (18:0_18:1_18:1) |

**Supplementary Table S2.** TG molecular species identified at C=C level in pooled human plasma using RPLC-PB-MS/MS

| <i>m/z</i> | Subclass | Molecular Species                                                                                 |
|------------|----------|---------------------------------------------------------------------------------------------------|
| 794.7      | 46:1     | TG (16:0_14:0_16:1( $\Delta$ 9))                                                                  |
| 816.7      | 48:4     | TG (12:0_18:2( $\Delta$ 9, $\Delta$ 12)_18:2( $\Delta$ 9, $\Delta$ 12))                           |
| 818.7      | 48:3     | TG (12:0_18:1( $\Delta$ 9)_18:2( $\Delta$ 9, $\Delta$ 12))                                        |
| 820.7      | 48:2     | TG (16:0_16:1( $\Delta$ 9)_16:1( $\Delta$ 9))                                                     |
| 822.7      | 48:1     | TG (14:0_16:0_18:1( $\Delta$ 9))                                                                  |
| 822.7      | 48:1     | TG (14:0_16:0_18:1( $\Delta$ 11))                                                                 |
| 844.7      | 50:4     | TG (14:0_18:2( $\Delta$ 9, $\Delta$ 12)_18:2( $\Delta$ 9, $\Delta$ 12))                           |
| 846.7      | 50:3     | TG (14:0_18:1( $\Delta$ 9)_18:2( $\Delta$ 9, $\Delta$ 12))                                        |
| 846.7      | 50:3     | TG (16:0_16:1( $\Delta$ 9)_18:2( $\Delta$ 9, $\Delta$ 12))                                        |
| 846.7      | 50:3     | TG (16:0_16:0_18:3( $\Delta$ 6, $\Delta$ 9, $\Delta$ 12))                                         |
| 848.8      | 50:2     | TG (14:0_18:1( $\Delta$ 9)_18:1( $\Delta$ 9))                                                     |
| 848.8      | 50:2     | TG (16:0_16:1( $\Delta$ 9)_18:1( $\Delta$ 9))                                                     |
| 848.8      | 50:2     | TG (16:0_16:0_18:2( $\Delta$ 9, $\Delta$ 12))                                                     |
| 850.8      | 50:1     | TG (16:0_16:0_18:1( $\Delta$ 9))                                                                  |
| 850.8      | 50:1     | TG (16:0_16:0_18:1( $\Delta$ 11))                                                                 |
| 860.8      | 51:3     | TG (18:2( $\Delta$ 9, $\Delta$ 12)_18:1( $\Delta$ 9)_15:0)                                        |
| 862.8      | 51:2     | TG (18:1( $\Delta$ 9)_18:1( $\Delta$ 9)_15:0)                                                     |
| 864.8      | 51:1     | TG (18:1( $\Delta$ 9)_16:0_17:0)                                                                  |
| 870.7      | 52:5     | TG (16:1( $\Delta$ 9)_18:2( $\Delta$ 9, $\Delta$ 12)_18:2( $\Delta$ 9, $\Delta$ 12))              |
| 870.7      | 52:5     | TG (16:0_18:2( $\Delta$ 9, $\Delta$ 12)_18:3( $\Delta$ 6, $\Delta$ 9, $\Delta$ 12))               |
| 872.8      | 52:4     | TG (16:0_18:2( $\Delta$ 9, $\Delta$ 12)_18:2( $\Delta$ 9, $\Delta$ 12))                           |
| 872.8      | 52:4     | TG (16:0_18:1( $\Delta$ 9)_18:3( $\Delta$ 6, $\Delta$ 9, $\Delta$ 12))                            |
| 872.8      | 52:4     | TG (16:0_16:0_20:4( $\Delta$ 5, $\Delta$ 8, $\Delta$ 11, $\Delta$ 14))                            |
| 872.8      | 52:4     | TG (16:1( $\Delta$ 9)_18:1( $\Delta$ 9)_18:2( $\Delta$ 9, $\Delta$ 12))                           |
| 874.8      | 52:3     | TG (16:1( $\Delta$ 9)_18:1( $\Delta$ 9)_18:1( $\Delta$ 9))                                        |
| 874.8      | 52:3     | TG (16:1( $\Delta$ 9)_18:1( $\Delta$ 9)_18:1( $\Delta$ 11))                                       |
| 874.8      | 52:3     | TG (16:0_18:1( $\Delta$ 9)_18:2( $\Delta$ 9, $\Delta$ 12))                                        |
| 874.8      | 52:3     | TG (16:0_18:1( $\Delta$ 11)_18:2( $\Delta$ 9, $\Delta$ 12))                                       |
| 876.8      | 52:2     | TG (16:0_18:1( $\Delta$ 9)_18:1( $\Delta$ 9))                                                     |
| 876.8      | 52:2     | TG (16:0_18:1( $\Delta$ 11)_18:1( $\Delta$ 11))                                                   |
| 876.8      | 52:2     | TG (16:0_18:0_18:2( $\Delta$ 9, $\Delta$ 12))                                                     |
| 878.8      | 52:1     | TG (16:0_18:0_18:1( $\Delta$ 9))                                                                  |
| 878.8      | 52:1     | TG (16:0_18:0_18:1( $\Delta$ 11))                                                                 |
| 890.8      | 53:2     | TG (18:1( $\Delta$ 9)_17:0_18:1( $\Delta$ 9))                                                     |
| 896.8      | 54:6     | TG (18:2( $\Delta$ 9, $\Delta$ 12)_18:2( $\Delta$ 9, $\Delta$ 12)_18:2( $\Delta$ 9, $\Delta$ 12)) |
| 896.8      | 54:6     | TG (16:0_18:2( $\Delta$ 9, $\Delta$ 12)_20:4( $\Delta$ 5, $\Delta$ 8, $\Delta$ 11, $\Delta$ 15))  |

**Supplementary Table S2. (continued)**

| <i>m/z</i> | Subclass | Molecular Species                                                                    |
|------------|----------|--------------------------------------------------------------------------------------|
| 898.8      | 54:5     | TG (18:1( $\Delta$ 9)_18:2( $\Delta$ 9, $\Delta$ 12)_18:2( $\Delta$ 9, $\Delta$ 12)) |
| 898.8      | 54:5     | TG (16:0_18:1( $\Delta$ 9)_20:4( $\Delta$ 5, $\Delta$ 8, $\Delta$ 11, $\Delta$ 14))  |
| 900.8      | 54:4     | TG (18:1( $\Delta$ 9)_18:1( $\Delta$ 9)_18:2( $\Delta$ 9, $\Delta$ 12))              |
| 900.8      | 54:4     | TG (18:1( $\Delta$ 11)_18:1( $\Delta$ 11)_18:2( $\Delta$ 9, $\Delta$ 12))            |
| 902.8      | 54:3     | TG (18:1 ( $\Delta$ 9)_18:1( $\Delta$ 9)_18:1 ( $\Delta$ 9))                         |
| 902.8      | 54:3     | TG (18:1 ( $\Delta$ 11)_18:1( $\Delta$ 11)_18:1 ( $\Delta$ 11))                      |
| 902.8      | 54:3     | TG (18:0_18:1( $\Delta$ 9)_18:2( $\Delta$ 9, $\Delta$ 12))                           |
| 902.8      | 54:3     | TG (18:0_18:1( $\Delta$ 11)_18:2( $\Delta$ 9, $\Delta$ 12))                          |
| 904.8      | 54:2     | TG (18:0_18:1( $\Delta$ 9)_18:1( $\Delta$ 9))                                        |
| 904.8      | 54:2     | TG (16:0_20:1( $\Delta$ 9)_18:1( $\Delta$ 9))                                        |
